# Supplementary material for: Neurotoxicity of a Biopesticide Analog on Zebrafish Larvae at Nanomolar Concentrations
Source: MDPI journal article supplement (doi:10.3390/ijms17122137), 2016-12-19
Supplement: s1 [file s1]

## Supplementary Materials: Neurotoxicity of a Biopesticide Analog on Zebrafish Larvae at Nanomolar Concentrations

Ahmed Nasri, Audrey J. Valverde, Daniel B. Roche, Catherine Desrumaux, Philippe Clair, Hamouda Beyrem, Laurent Chaloin, Alain Ghysen and Véronique Perrier

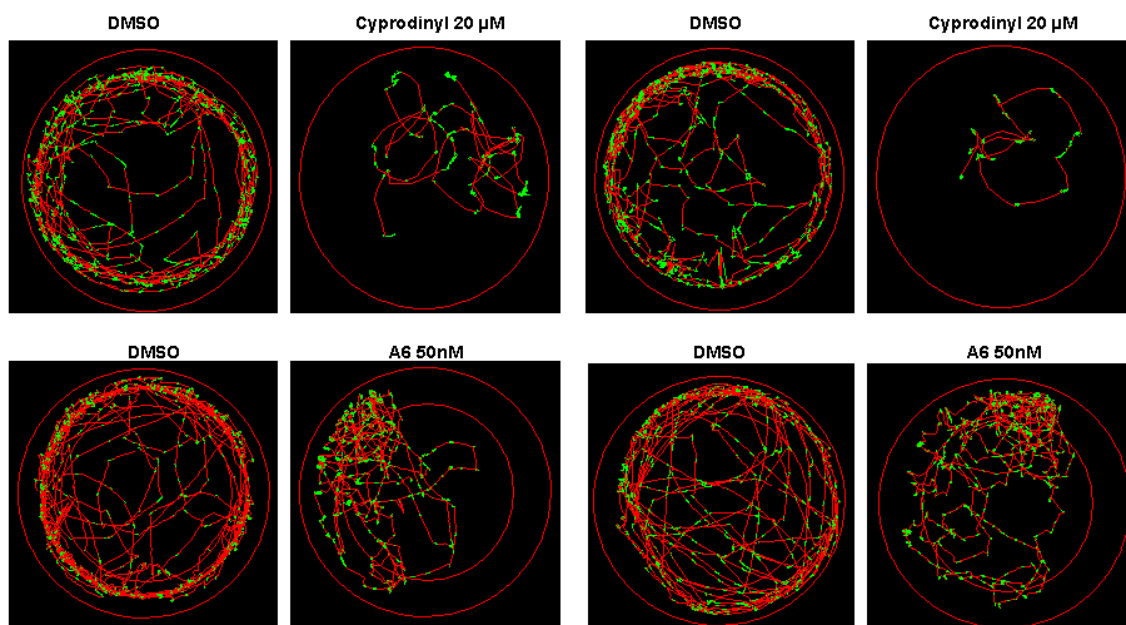

**Figure S1.** Larval behavior. Larvae are put individually in an observation chamber and their movements are continuously recorded over the next 10 min. Red lines reflect stretches of swimming longer than 2 mm, green lines reflect small movements (0.5–2 mm), below 0.5 mm the larva is considered inactive. The figure shows four representative tracks from 15 larvae exposed to either cyprodinyl 20 μM (**upper row**) or A6 50 nM (**lower row**).
